# Supplementary material for: Total syntheses of rubiginone A2, C2, and fujianmycin A
Source: Royal Society of Chemistry journal article supplement (doi:10.1039/c3ra47775d), 2014-01-01

## **Supporting Information**

**for**

# **Total Syntheses of Rubiginone A<sub>2</sub>, C<sub>2</sub>, and Fujianmycin A**

Devendar G. Vanga, Krishna P. Kaliappan\*

Department of Chemistry, Indian Institute of Technology Bombay, Powai, Mumbai-400076,

India

Fax: +91(22)25723480

E-mail: [kpk@chem.iitb.ac.in](mailto:kpk@chem.iitb.ac.in)

\* Corresponding author

**copies of NMR spectra for all new compounds**

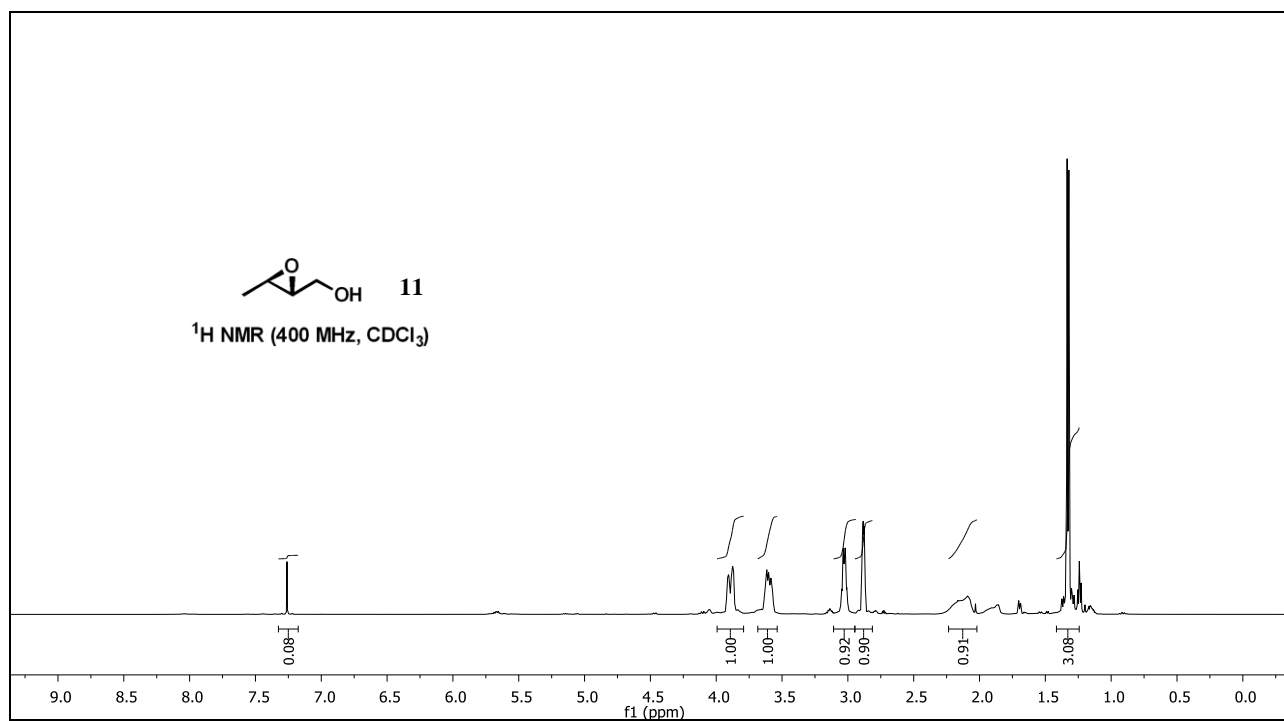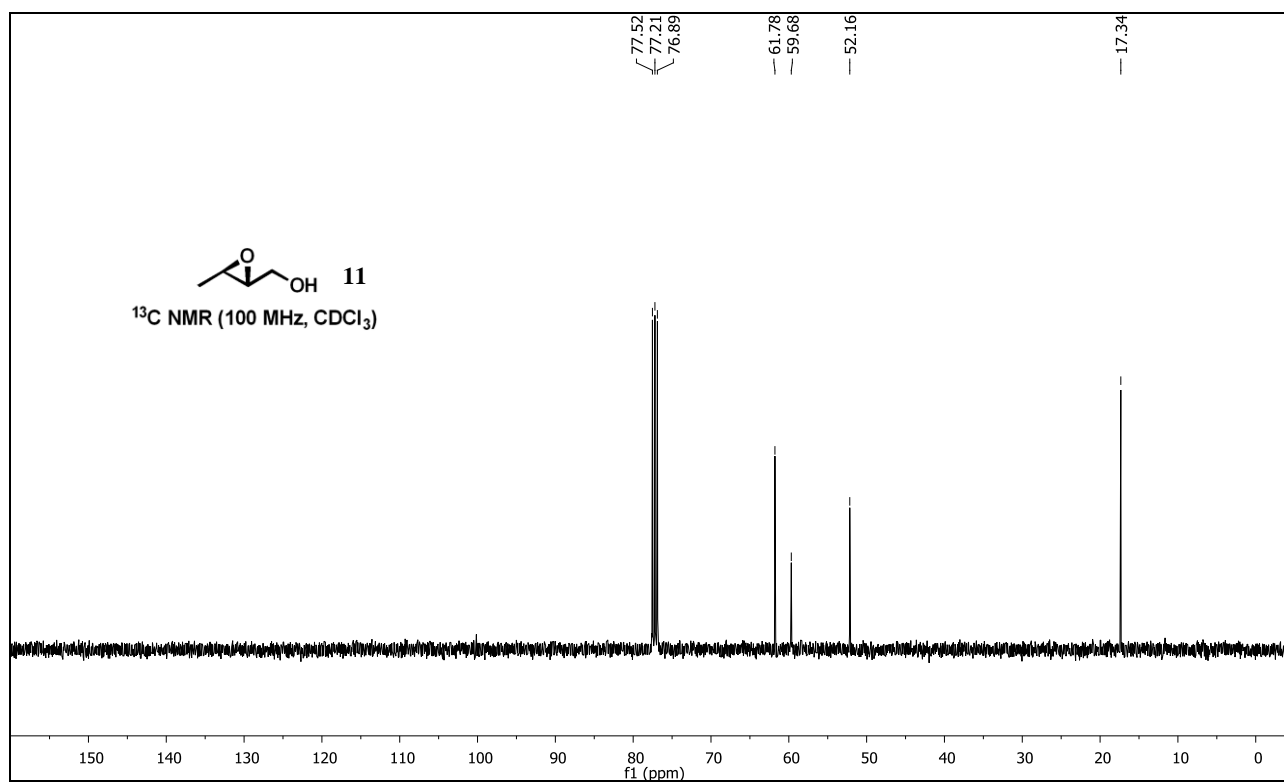

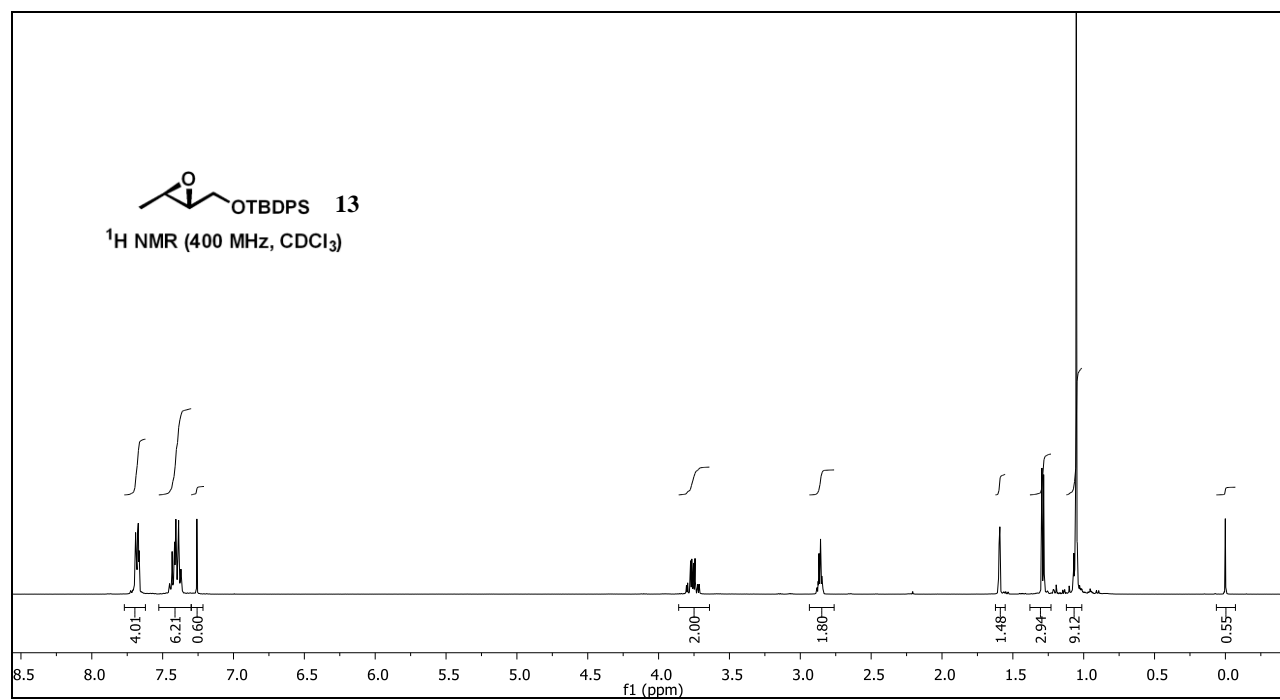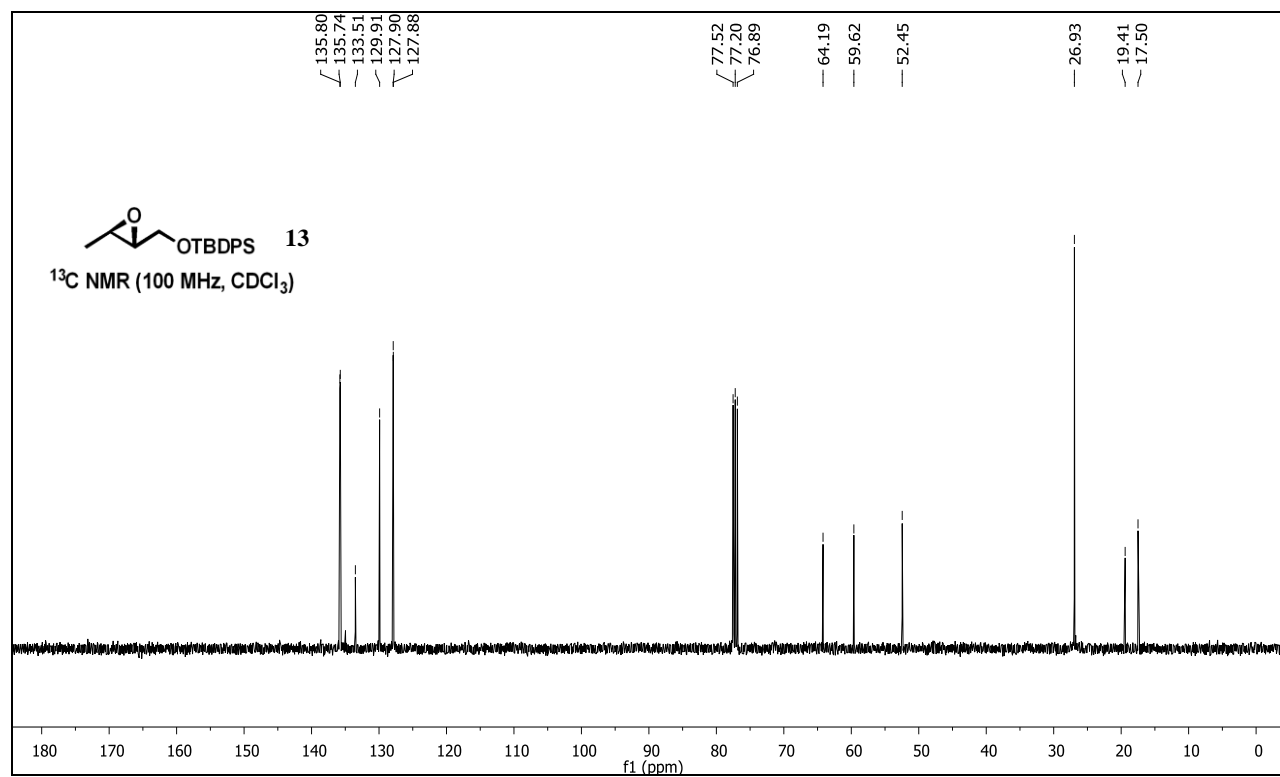

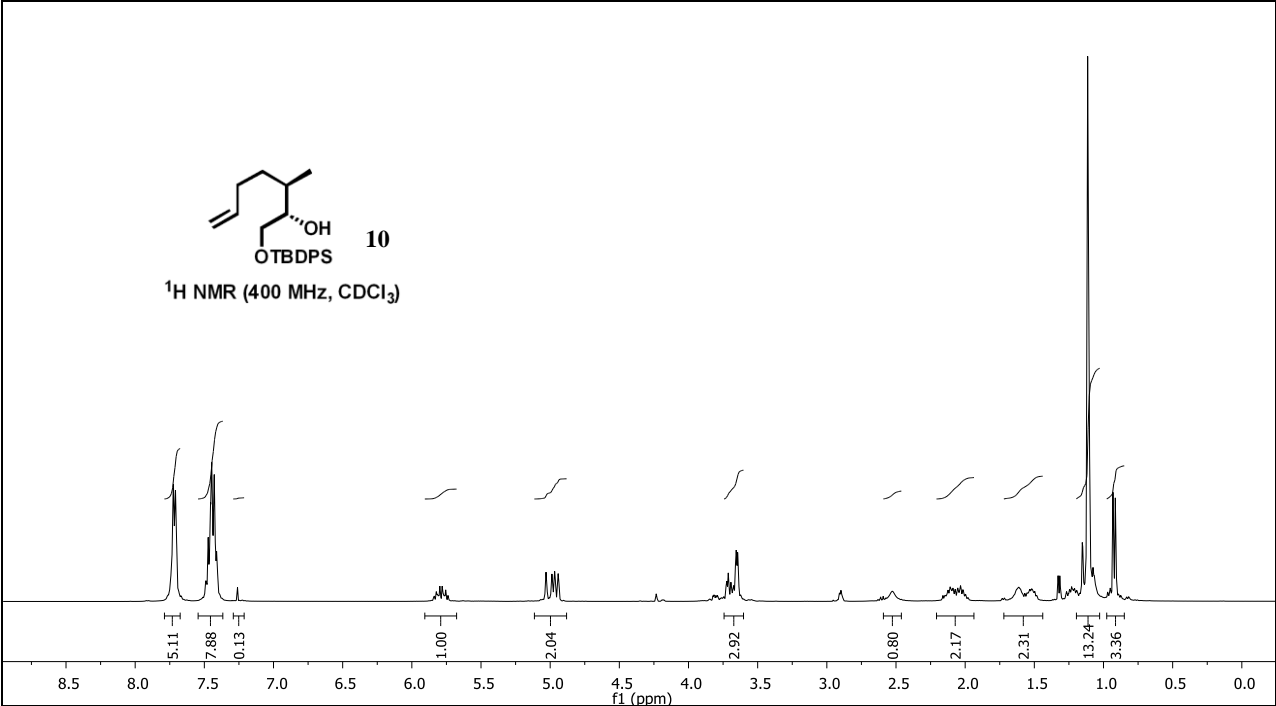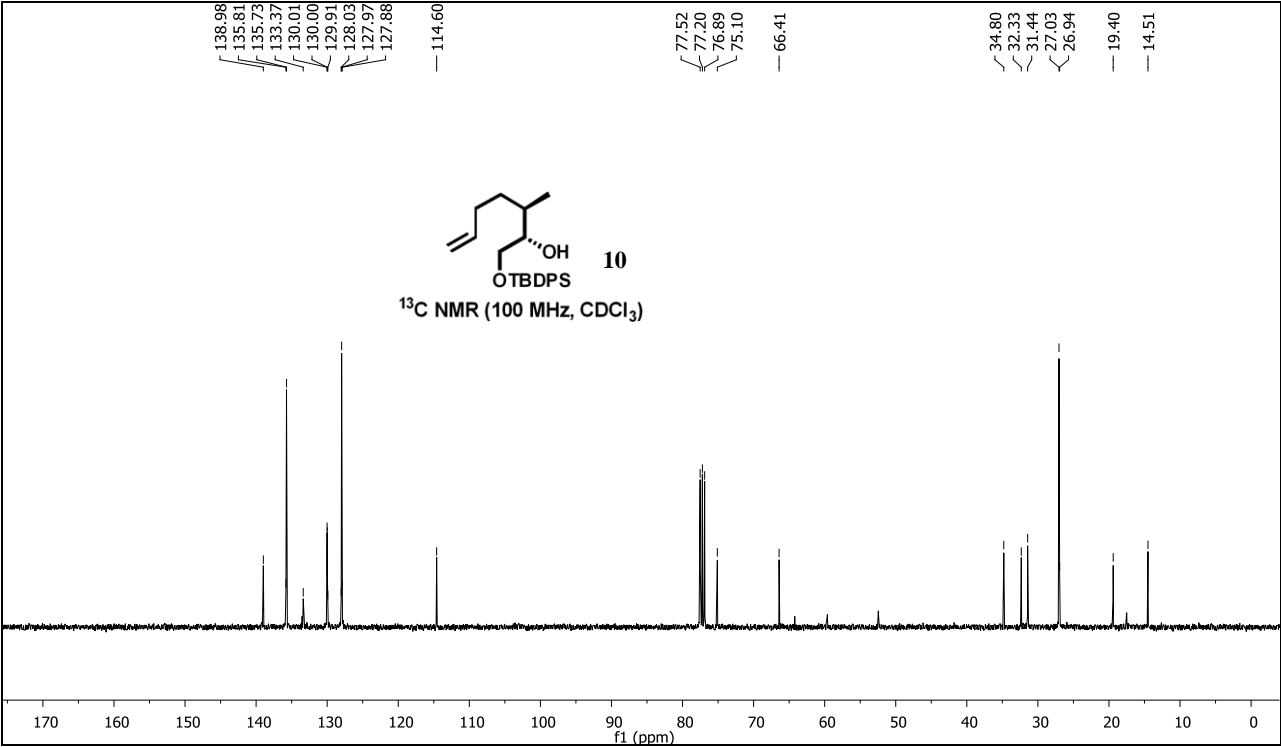

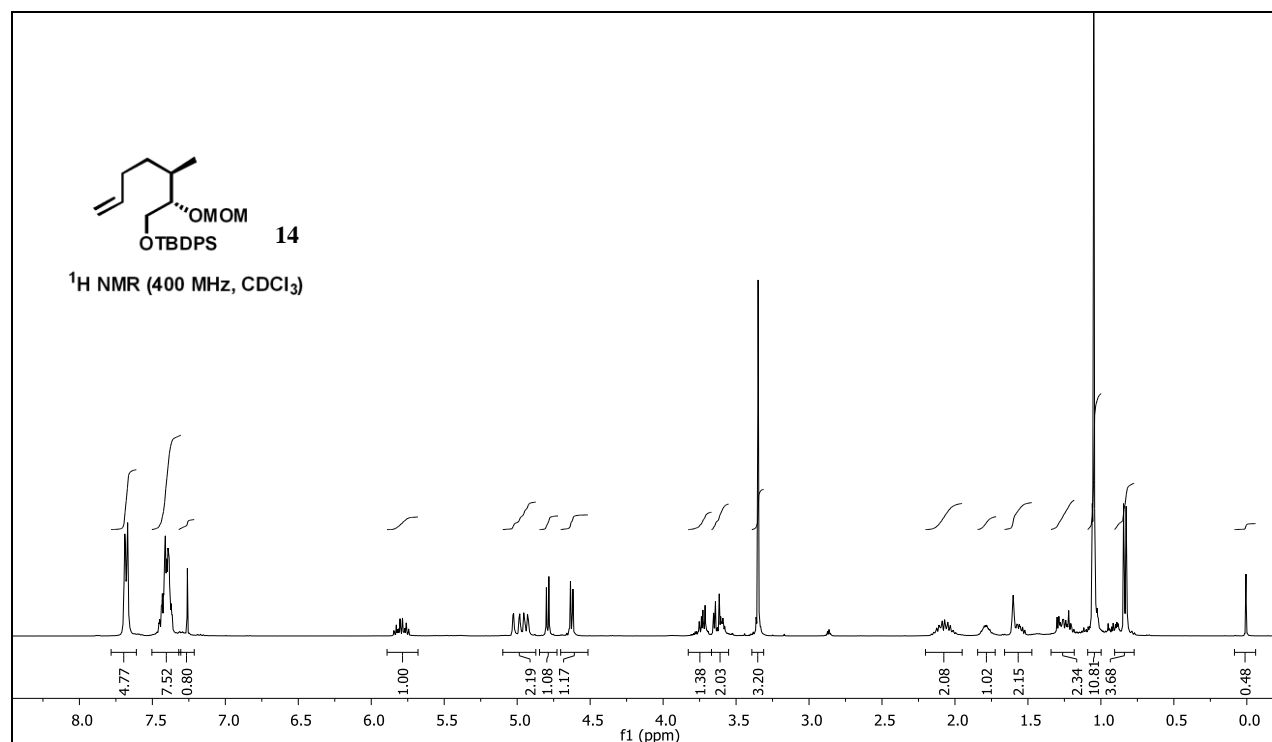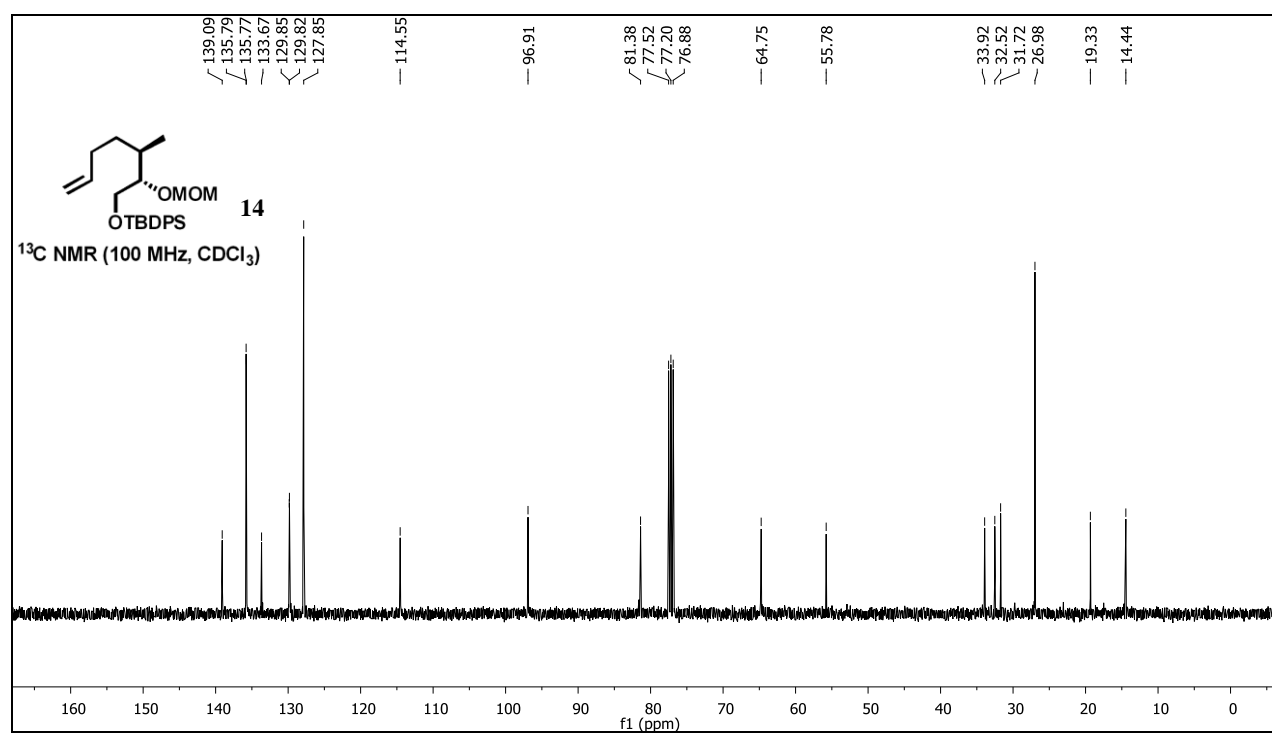

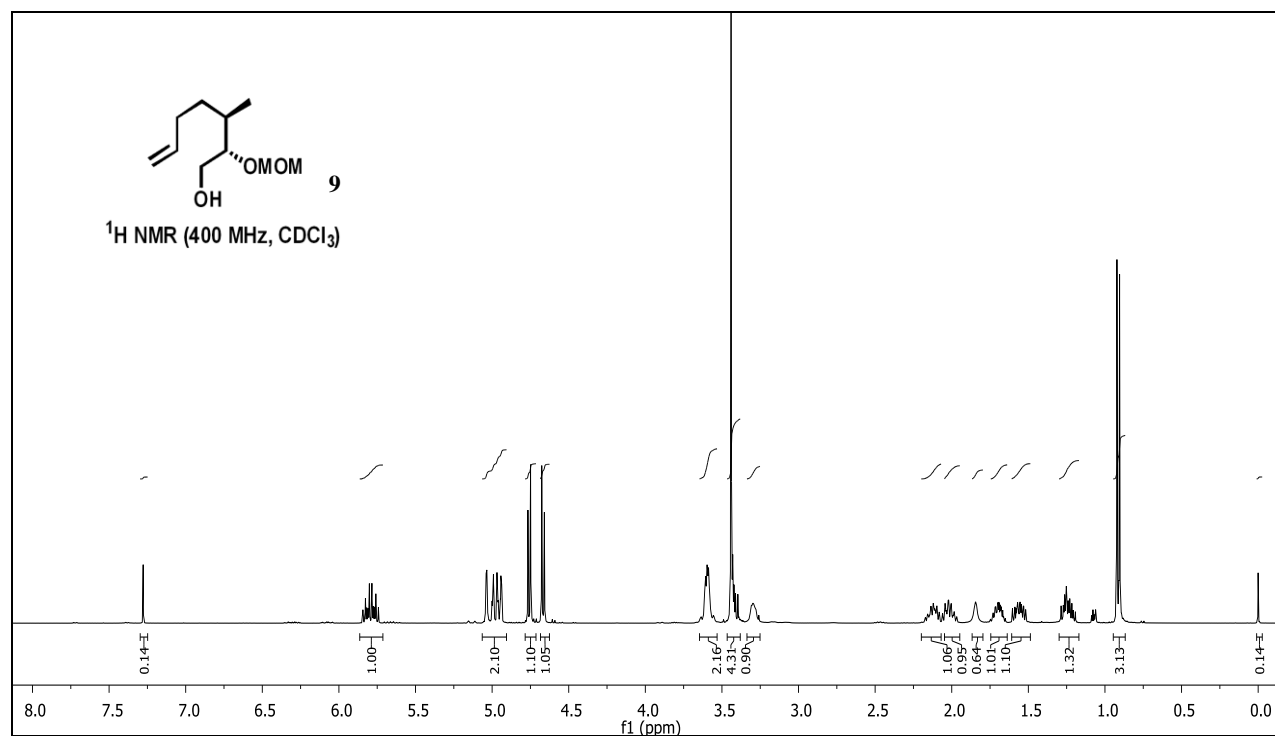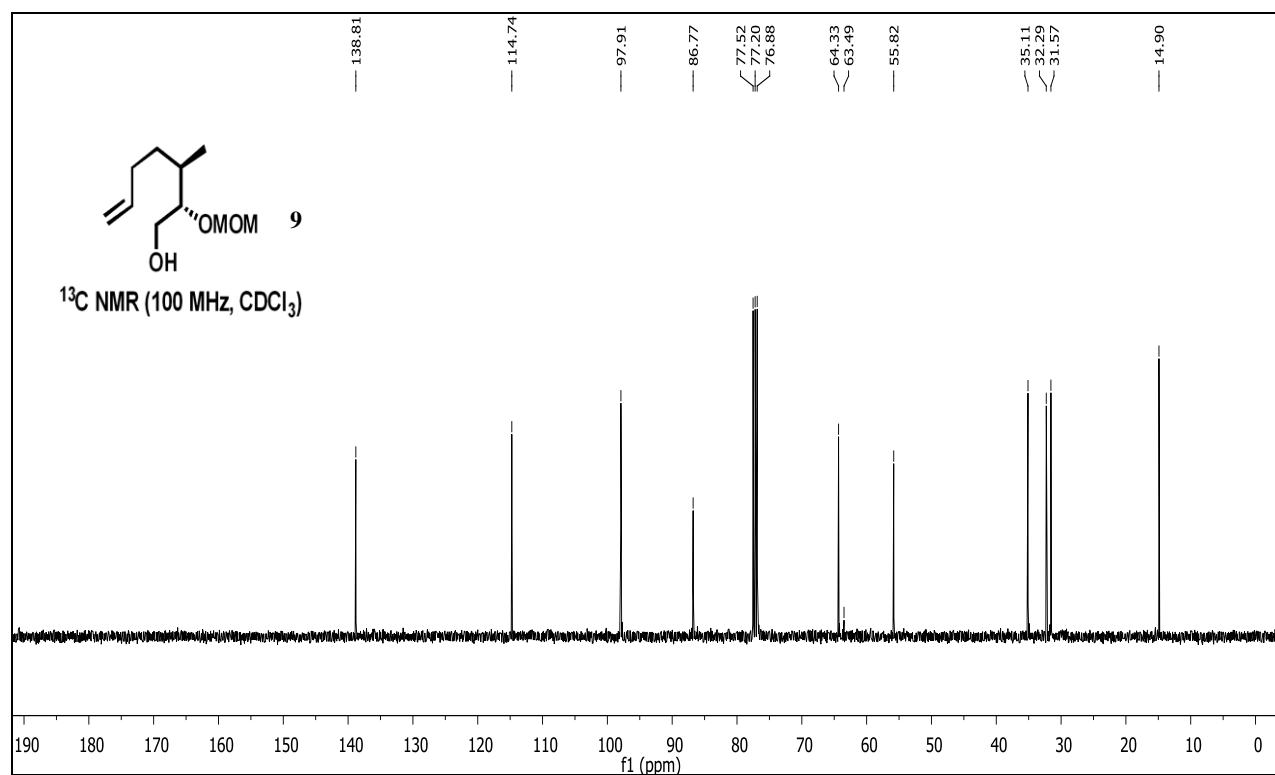

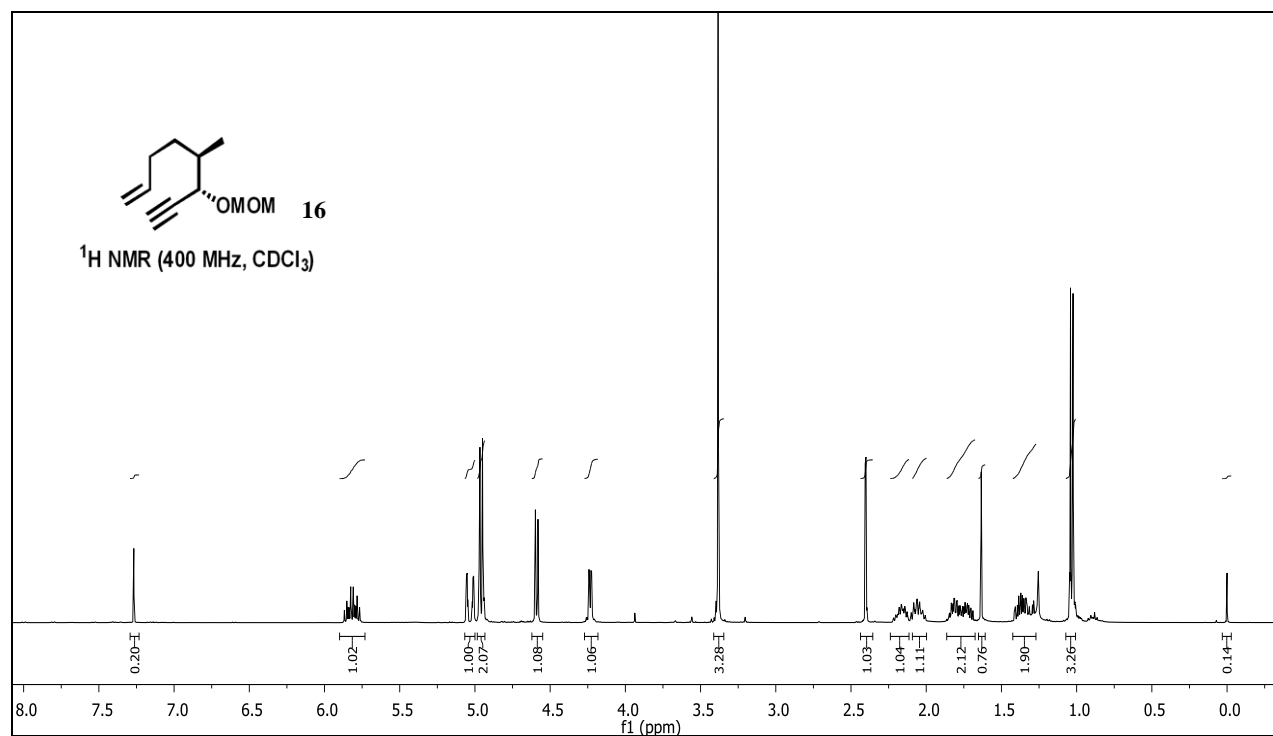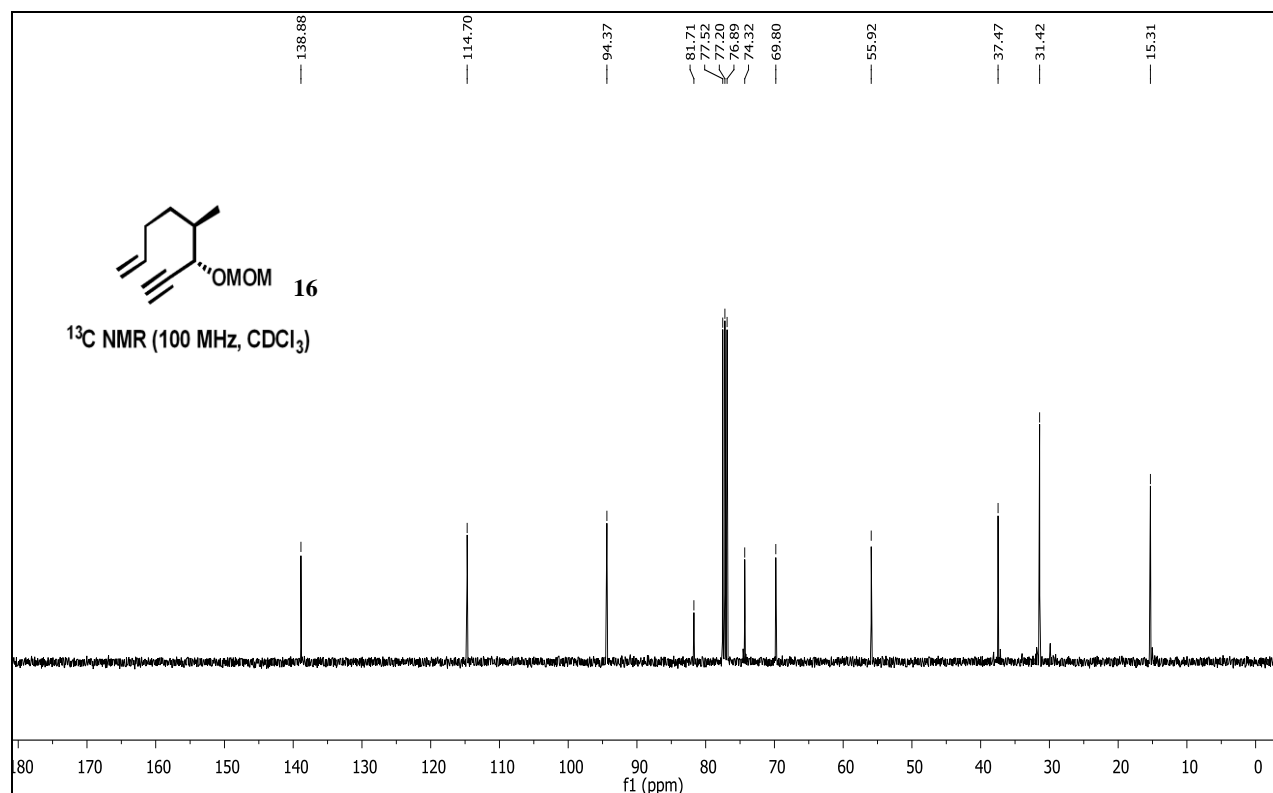

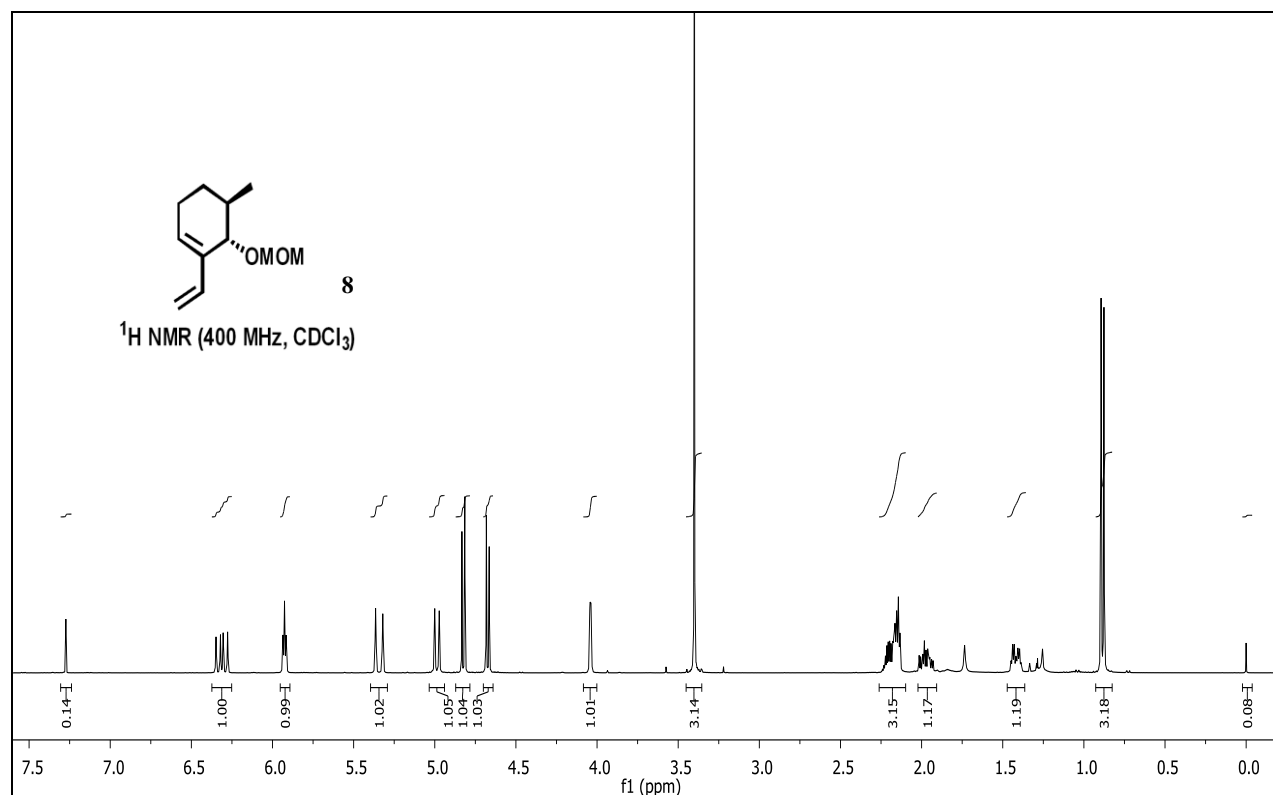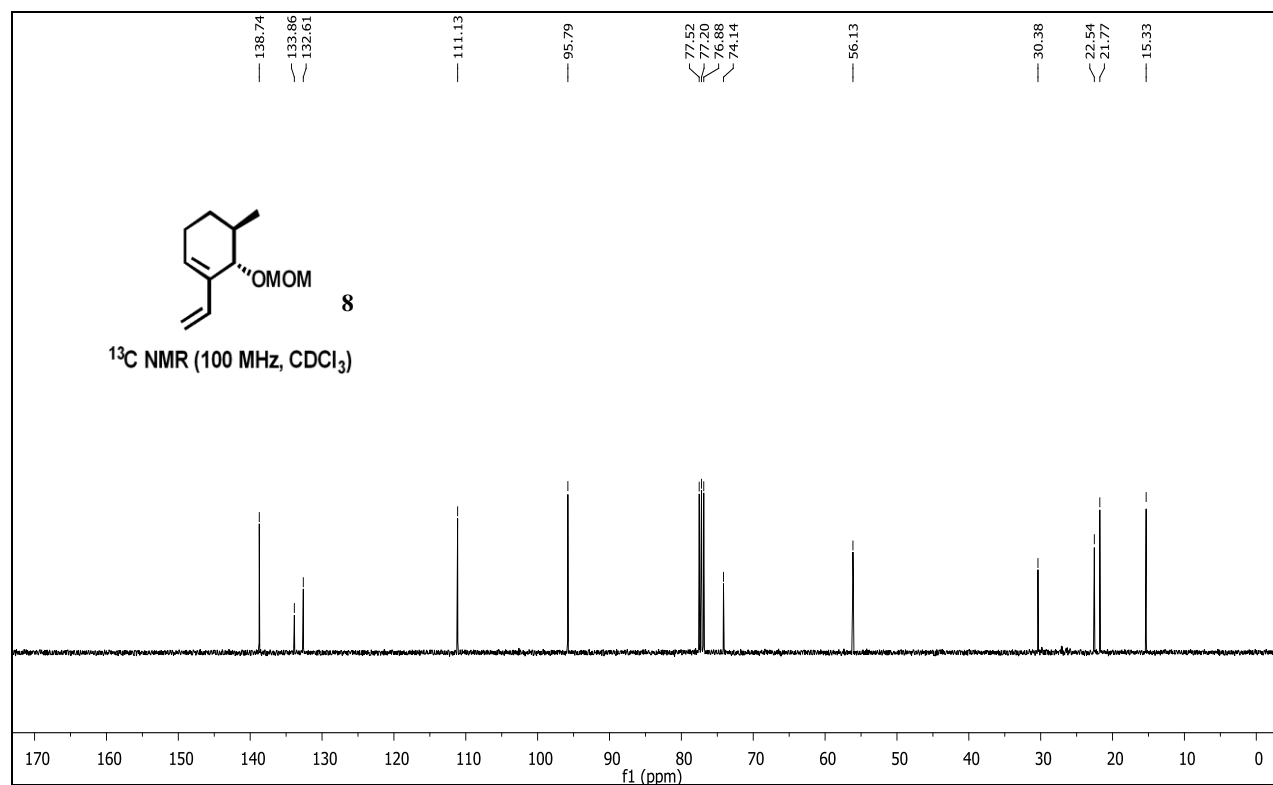



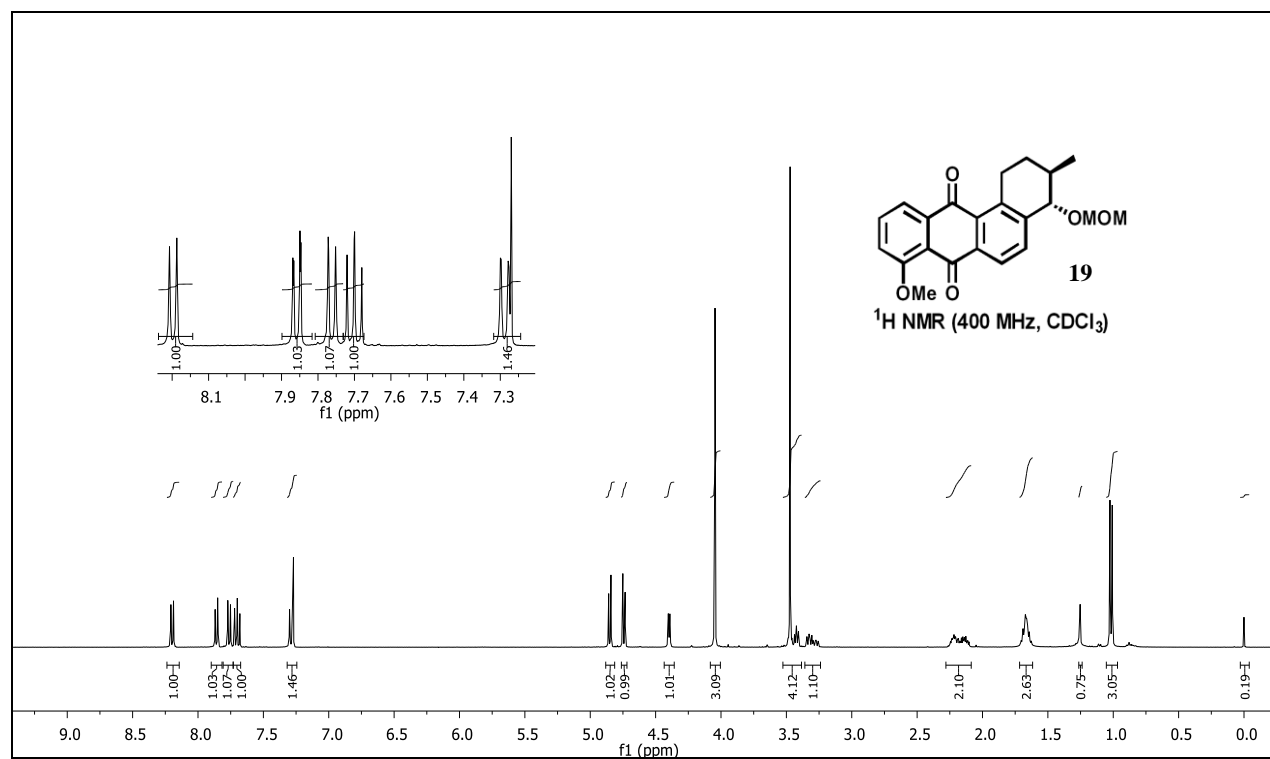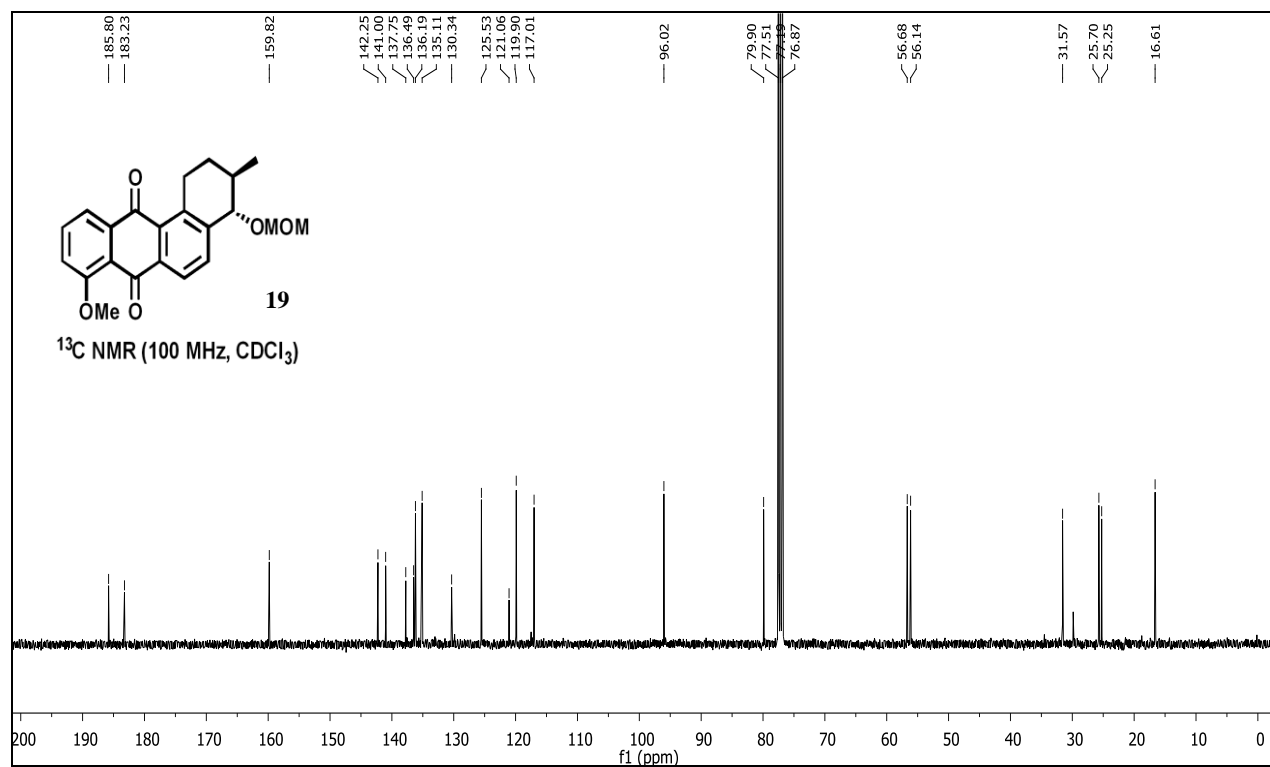

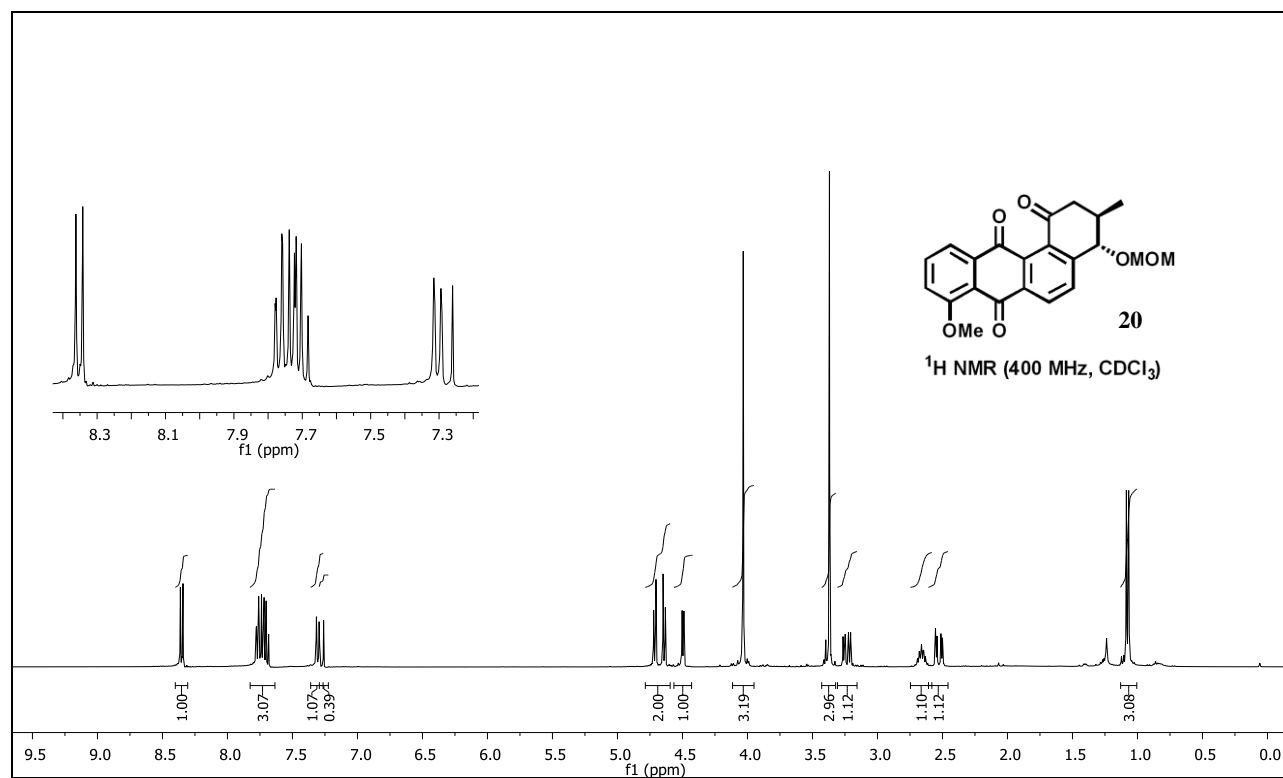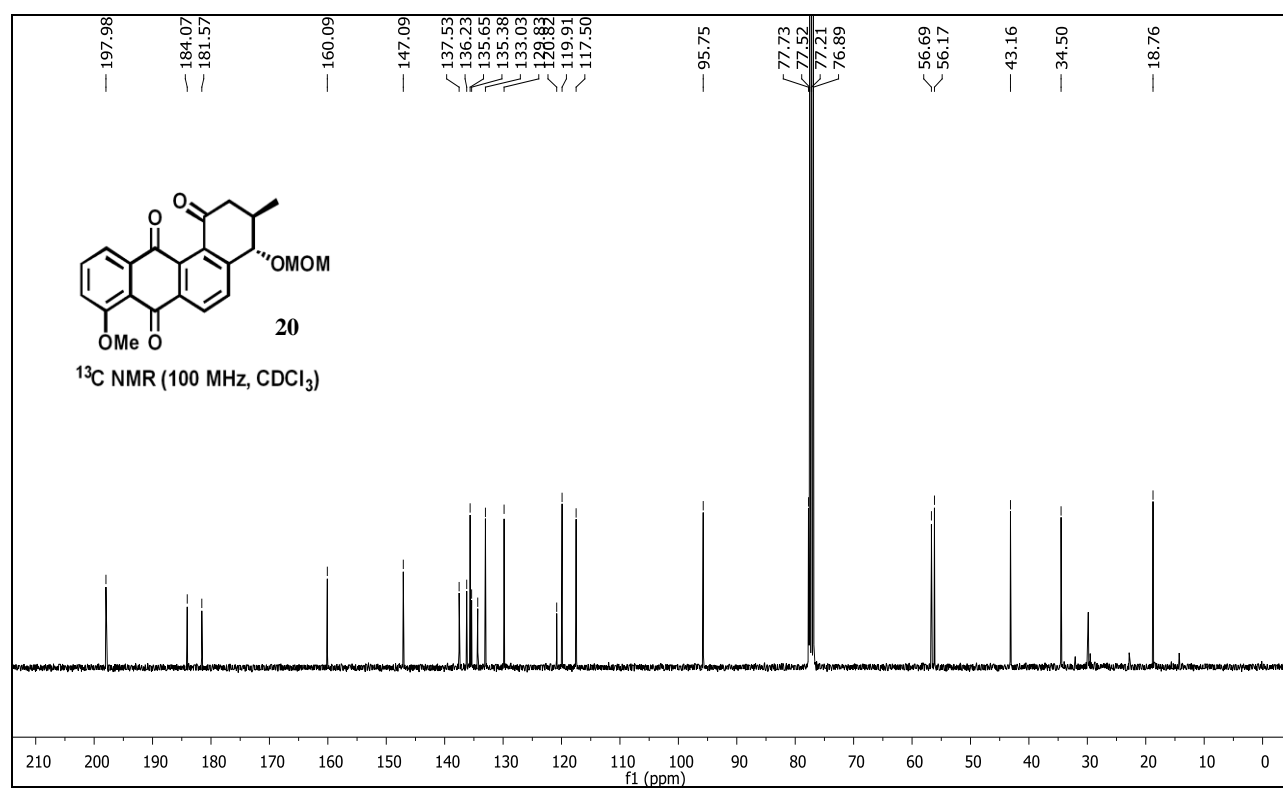

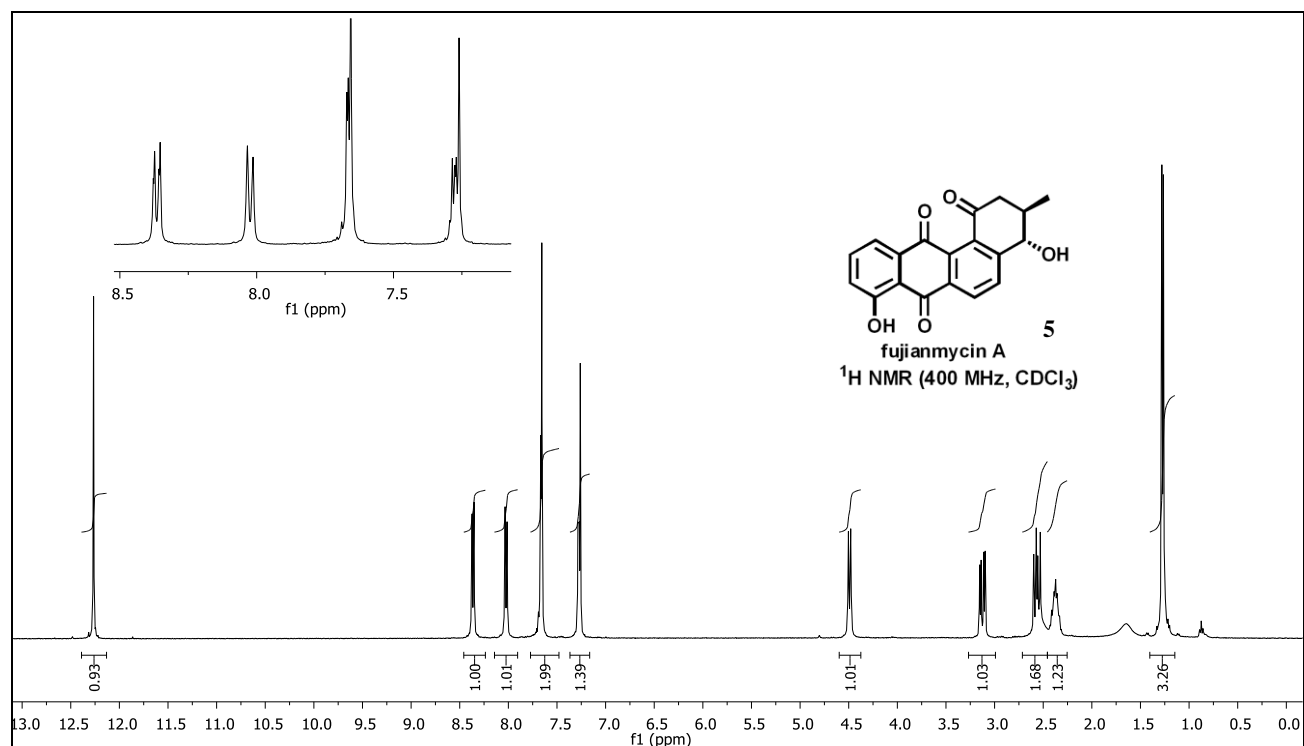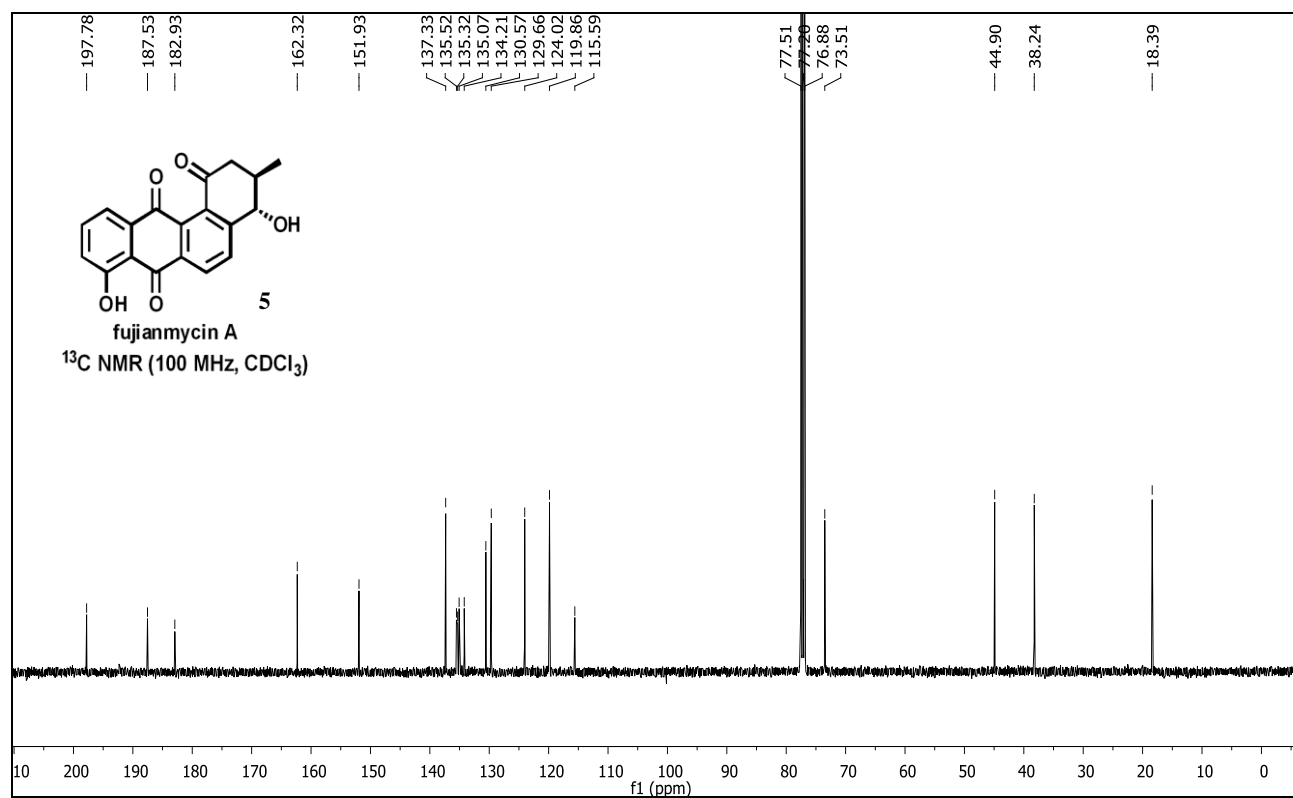

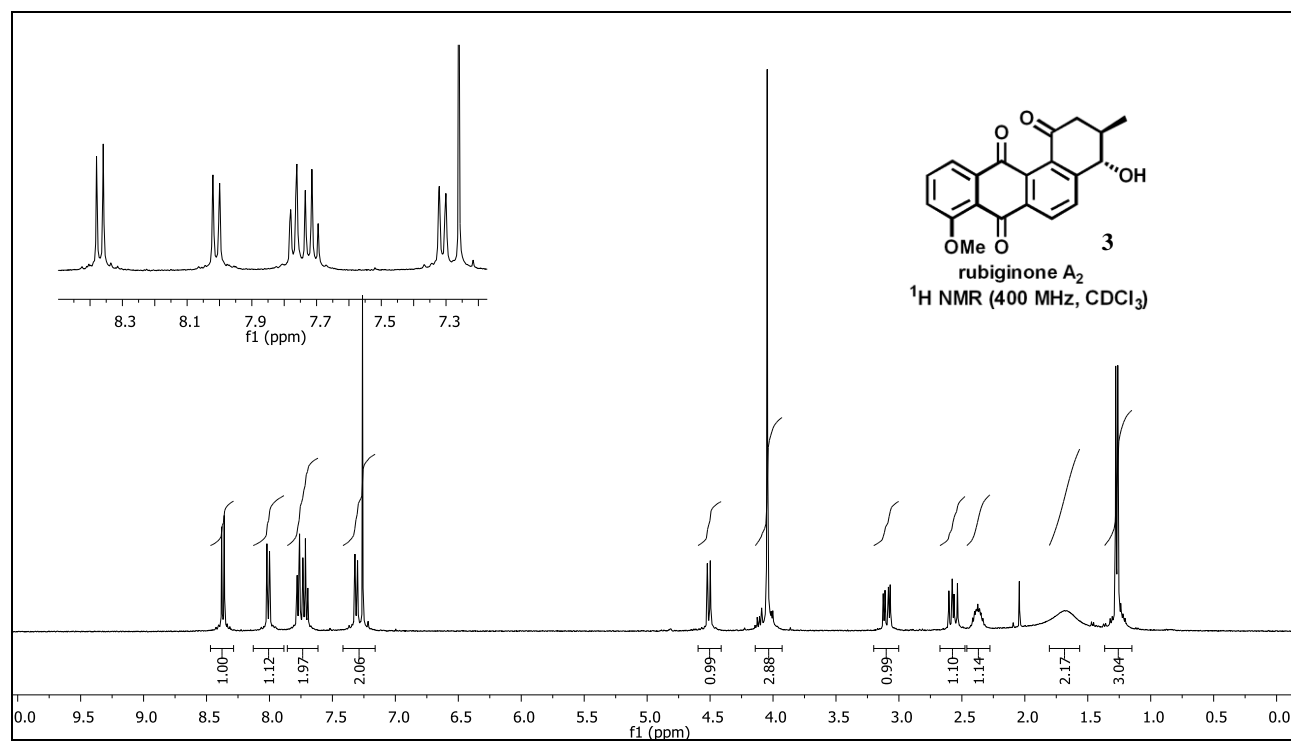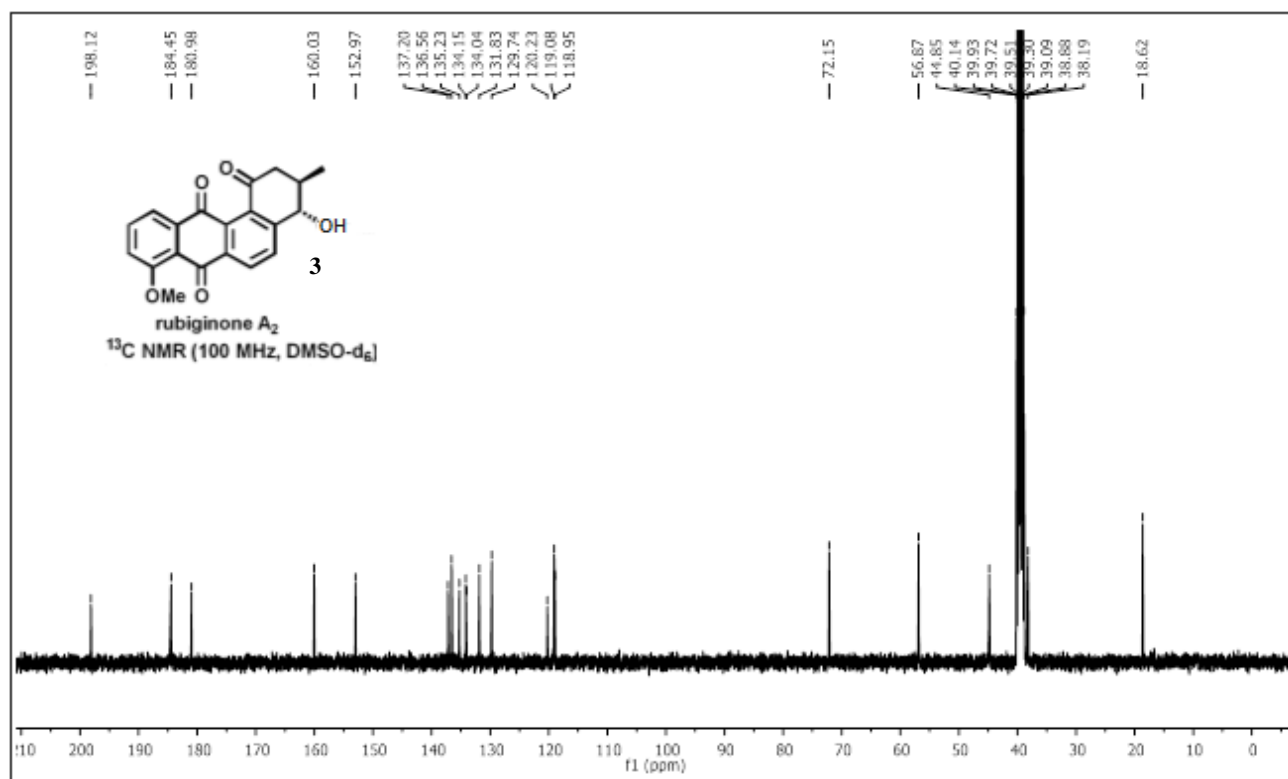

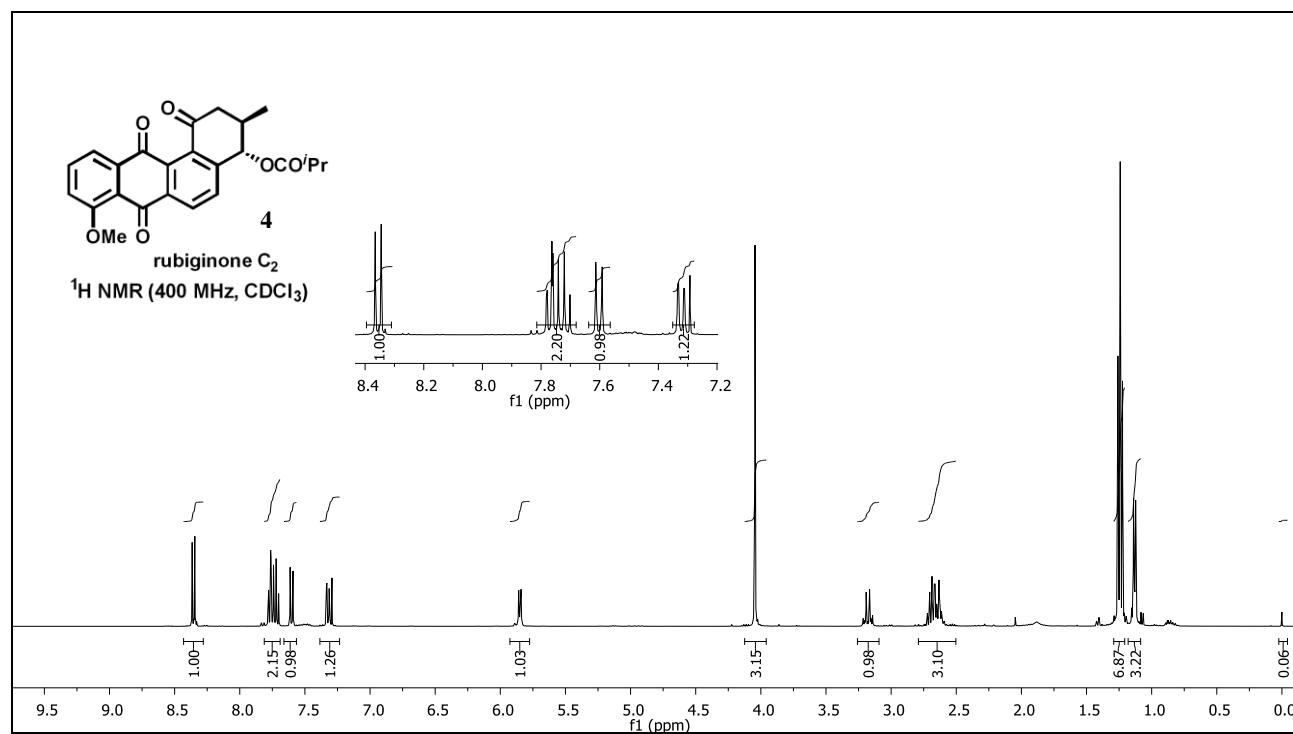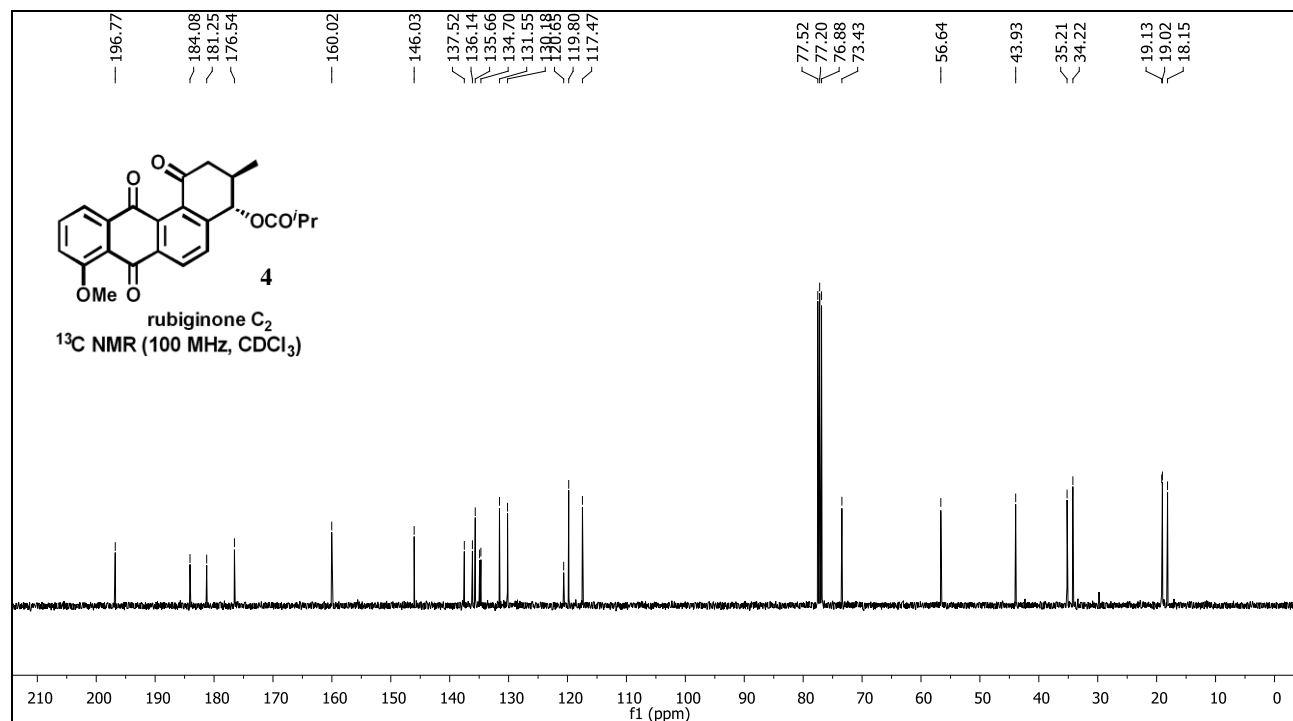

Supplement: c3ra47775d.pdf [file c3ra47775d.pdf]
